# Supplementary material for: Goji berry (Lycium spp.) extracts exhibit antiproliferative activity via modulating cell cycle arrest, cell apoptosis, and the p53 signaling pathway
Source: Royal Society of Chemistry journal article supplement (doi:10.1039/d1fo01105g), 2021-01-01
Supplement: d1fo01105g1.pdf [file d1fo01105g1.pdf]

**Table S1** Primers used for quantitative RT-PCR analysis

| Gene           | Gene ID | Forward primer (5'-3') | Reverse primer (5'-3') |
|----------------|---------|------------------------|------------------------|
| $\beta$ -actin | 60      | GTTGCTATCCAGGCTGTGC    | GCATCCTGTCCGCAATGC     |
| p53            | 7157    | CCCCTCCTCAGCATCTTA     | ACAAACACGCACCTCAAA     |
| p21            | 1026    | GCTTGCCCGAGTTCTACTACAG | ACCAAATGCGTGTCTCA      |
| CDK2           | 1017    | CGCTTCATGGAGAACTTC     | ATGGCAGAAAGCTAGGCC     |
| CDK4           | 1019    | CTGGACACTGAGAGGGCAAT   | TGGGAAGGAGAAGGAGAAGC   |
| Cyclin E       | 898     | CAGGGTATCAGTGGTGCGA    | CACAGAGACAGCTTGGATTTG  |
| Bax            | 581     | TTTGCTTCAGGGTTTCATCC   | CAGTTGAAGTTGCCGTCAGA   |
| Bcl-2          | 596     | CATCCATTATAAGCTGTGCGA  | TGCCGGTTCAGGTACTCAGT   |
| Caspase 3      | 836     | GTGCTATTGTGAGGCGGTTG   | TCCAGAGTCCATTGATTGCTT  |

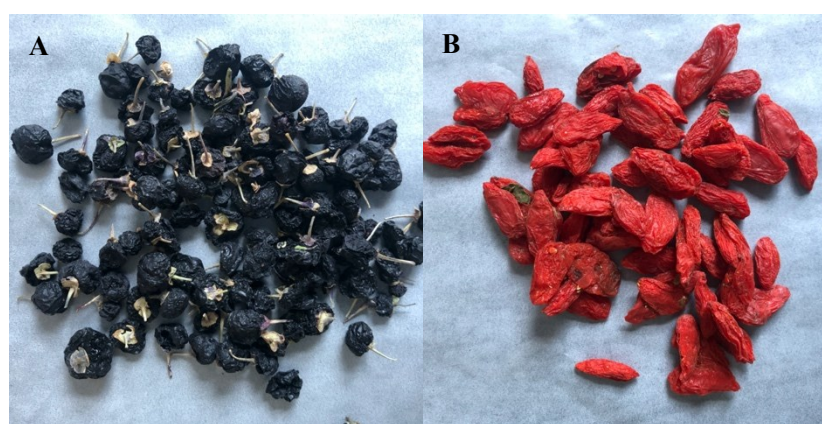

**Figure S1.** The morphology of (A) *Lycium ruthenicum*Murr. (LRM) and (B) *Lycium Barbarum*. (LB).

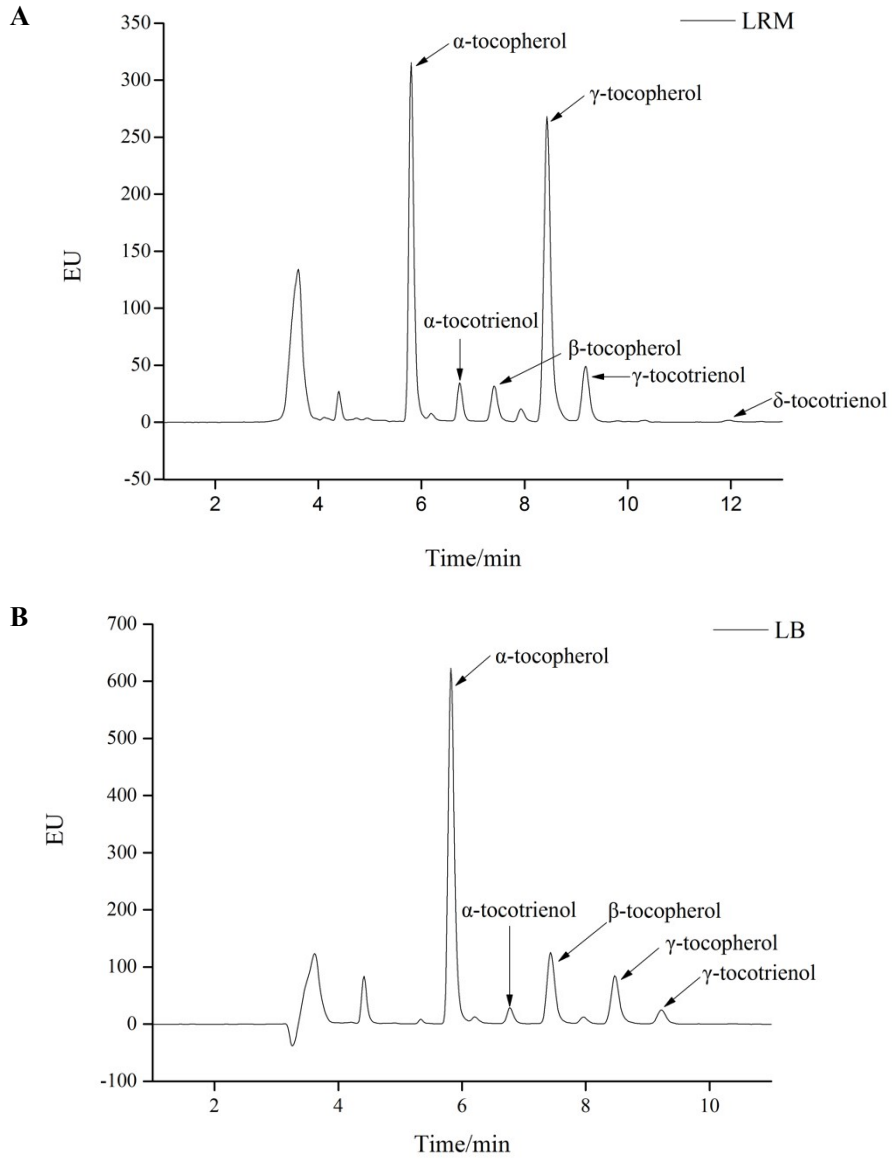

**Figure S2.** HPLC chromatogram of  $V_E$  profile in two goji berry varieties: LRM (A) and LB (B).

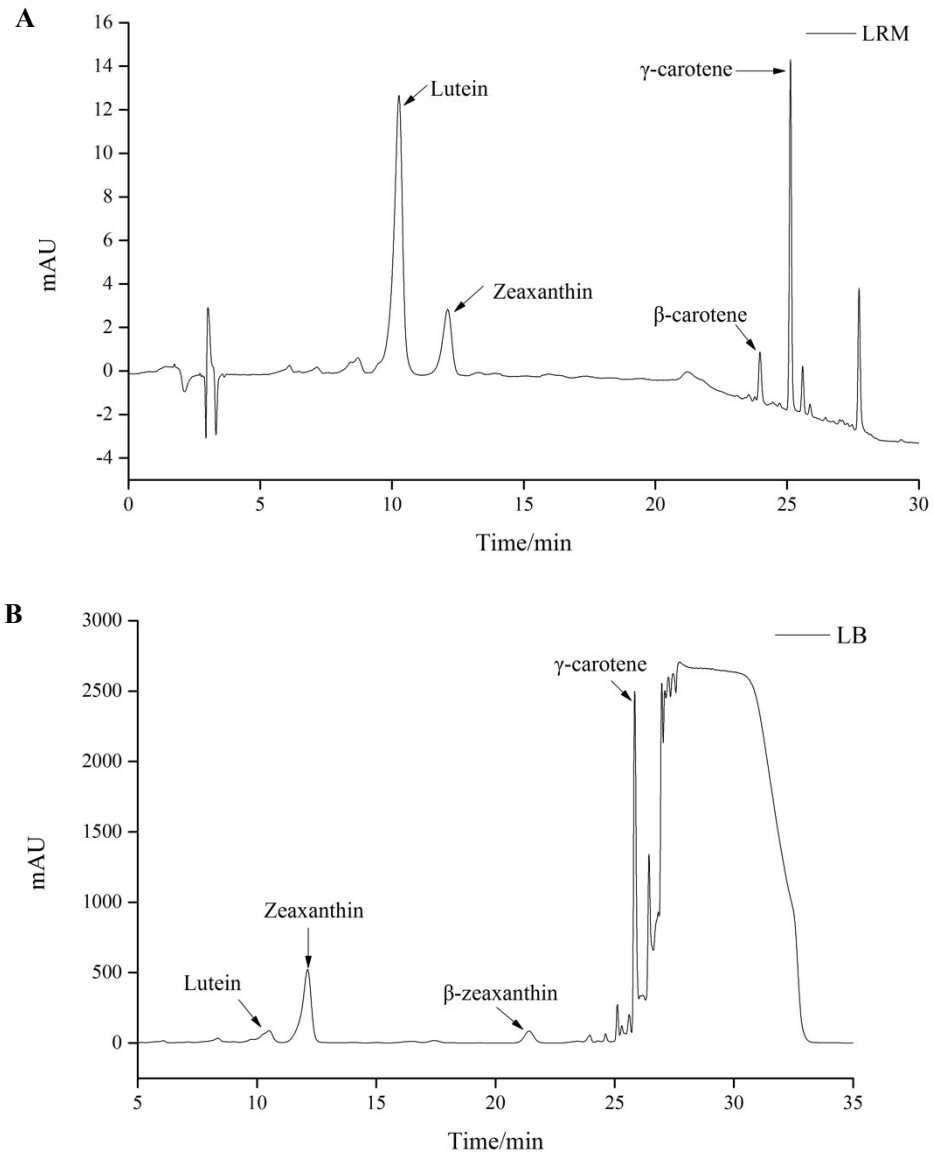

**Figure S3.** HPLC chromatogram of carotenoids profile in two goji berry varieties: LRM (A) and LB (B).
